# Supplementary material
Source: PubMed Central journal article supplement (PMC1863511)

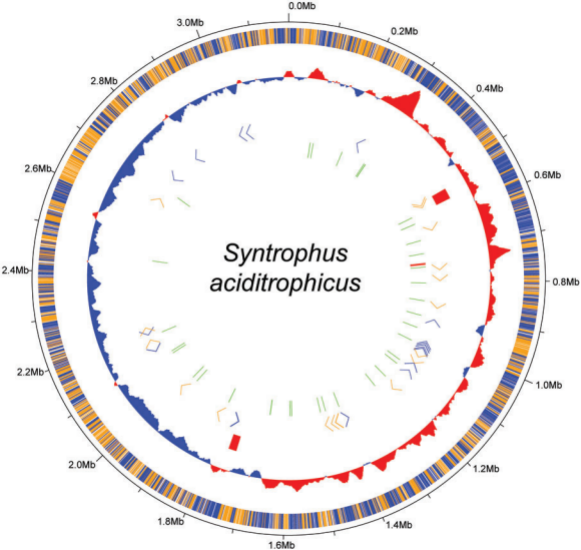

Supplement: pnas_0610456104_1.pdf [file pnas_0610456104_1.pdf]

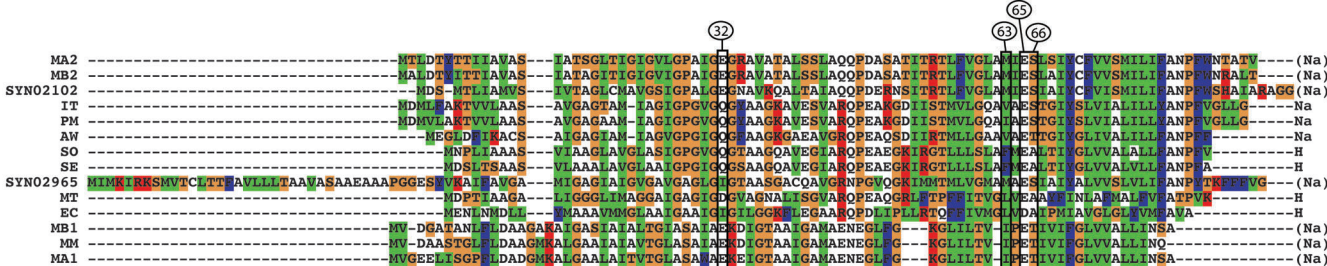

Supplement: pnas_0610456104_2.pdf [file pnas_0610456104_2.pdf]
